# Supplementary material for: Feasibility of a home-based interdisciplinary rehabilitation program for patients with Post-Intensive Care Syndrome: the REACH study
Source: Springer Nature journal article supplement (doi:10.1186/s13054-021-03709-z), 2021-08-05
Supplement: MOESM1 [file 19546202]

Additional file: Occupational Therapy Screening Questions and referral protocol

with: Major et al. ***Feasibility of a home-based interdisciplinary rehabilitation program for patients with Post-Intensive Care Syndrome: the REACH study***

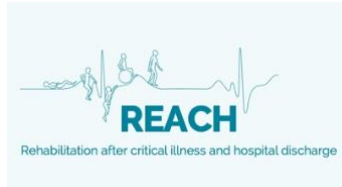

**1. Do you experience difficulty with resuming work activities?**

- No*
- Yes --> refer to OT*

**2. Do you experience difficulty with limited energy or fatigue? Or do you feel that fatigue has a negative effect on your daily life?**

- No*
- Yes --> refer to OT*

**3. Do you experience difficulty with performing your daily activities?**

- No*
- Yes--> refer to OT*

**4. Do you experience difficulty with your memory and/or concentration?**

- No*
- Yes--> refer to OT*

In case the answer to any of these questions is 'Yes' discuss referral to OT with the participant. If the participant agrees to referral, contact the nearest REACH-OT.
